# Supplementary material
Source: Springer Nature journal article supplement (https://www.springerprofessional.de/resource/supplementary/13673_2011_15_MOESM13_ESM.pdf/11899340)

## HC Base - Execution time

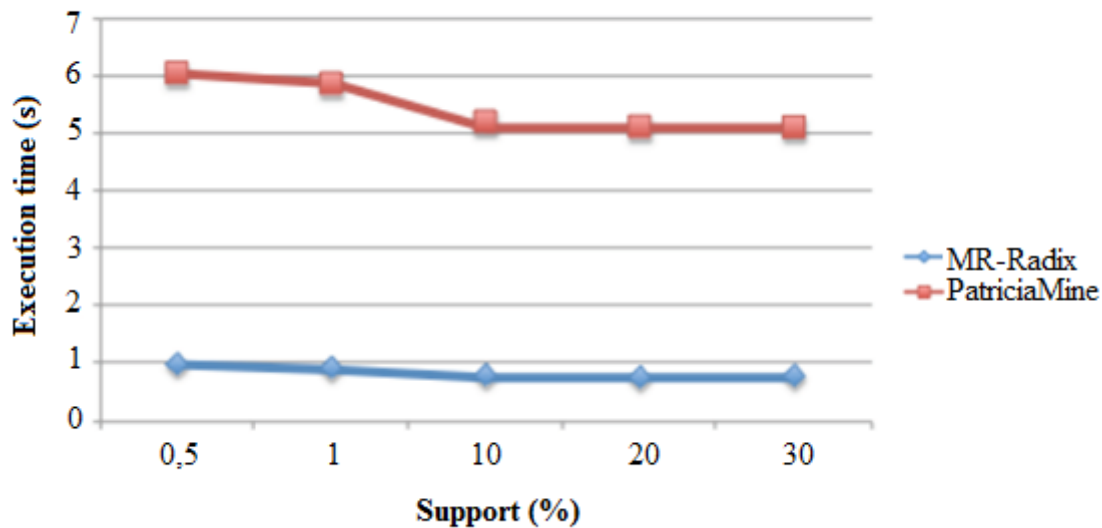

Supplement: MOESM13 [file 11899340]
